# Supplementary material
Source: HighWire-hosted journal article supplement (https://openheart.bmj.com/content/5/1/e000756)
Supplement: inline-supplementary-material-1 [file inline-supplementary-material-1.docx]

Appendix

| TAVI | | | | | | | | | | | | |
| --- | --- | --- | --- | --- | --- | --- | --- | --- | --- | --- | --- | --- |
|  | Male | | | | | | Female | | | | | |
|  | Comorbidity index (quintiles) | | | | |  | Comorbidity index (quintiles) | | | | |  |
| Age | 1st | 2nd | 3rd | 4th | 5th | Total | 1st | 2nd | 3rd | 4th | 5th | Total |
| 75 | 0 | 2 | 0 | 0 | 2 | 4 | 0 | 0 | 4 | 0 | 1 | 5 |
| 76 | 0 | 0 | 0 | 3 | 1 | 4 | 1 | 0 | 0 | 0 | 2 | 3 |
| 77 | 2 | 4 | 0 | 2 | 0 | 8 | 0 | 1 | 1 | 3 | 1 | 6 |
| 78 | 0 | 1 | 0 | 0 | 1 | 2 | 1 | 2 | 1 | 3 | 0 | 7 |
| 79 | 1 | 0 | 0 | 1 | 3 | 5 | 1 | 2 | 2 | 1 | 1 | 7 |
| 80 | 0 | 1 | 2 | 1 | 1 | 5 | 1 | 1 | 1 | 4 | 3 | 10 |
| 81 | 2 | 1 | 1 | 1 | 2 | 7 | 2 | 1 | 1 | 4 | 3 | 11 |
| 82 | 0 | 2 | 2 | 2 | 2 | 8 | 2 | 1 | 0 | 2 | 1 | 6 |
| 83 | 1 | 1 | 0 | 2 | 1 | 5 | 1 | 4 | 5 | 3 | 3 | 16 |
| 84 | 0 | 2 | 1 | 2 | 0 | 5 | 2 | 3 | 3 | 3 | 0 | 11 |
| 85 | 0 | 1 | 0 | 0 | 0 | 1 | 1 | 3 | 2 | 1 | 0 | 7 |
| 86 | 1 | 0 | 1 | 1 | 0 | 3 | 1 | 4 | 1 | 4 | 1 | 11 |
| 87 | 1 | 0 | 0 | 0 | 0 | 1 | 2 | 4 | 2 | 2 | 2 | 12 |
| 88 | 0 | 1 | 0 | 0 | 1 | 2 | 0 | 2 | 5 | 1 | 0 | 8 |
| 89 | 0 | 0 | 0 | 0 | 0 | 0 | 1 | 0 | 1 | 0 | 0 | 2 |
| 90 | 0 | 1 | 0 | 0 | 0 | 1 | 0 | 2 | 0 | 1 | 1 | 4 |
| Total | 8 | 17 | 7 | 15 | 14 | 61 | 16 | 30 | 29 | 32 | 19 | 126 |

Table A-1: Composition of TAVI cases by sex and comorbidity index over age.

| Control | | | | | | | | | | | | |
| --- | --- | --- | --- | --- | --- | --- | --- | --- | --- | --- | --- | --- |
|  | Male | | | | | | Female | | | | | |
|  | Comorbidity index (quintiles) | | | | |  | Comorbidity index (quintiles) | | | | |  |
| Age | 1st | 2nd | 3rd | 4th | 5th | Total | 1st | 2nd | 3rd | 4th | 5th | Total |
| 75 | 0 | 8 | 0 | 0 | 8 | 16 | 0 | 0 | 16 | 0 | 4 | 20 |
| 76 | 0 | 0 | 0 | 12 | 4 | 16 | 4 | 0 | 0 | 0 | 8 | 12 |
| 77 | 8 | 16 | 0 | 8 | 0 | 32 | 0 | 4 | 4 | 12 | 4 | 24 |
| 78 | 0 | 01 | 0 | 0 | 4 | 4 | 4 | 8 | 4 | 12 | 0 | 28 |
| 79 | 4 | 0 | 0 | 4 | 12 | 20 | 4 | 8 | 8 | 4 | 4 | 28 |
| 80 | 0 | 4 | 8 | 4 | 4 | 20 | 4 | 4 | 4 | 16 | 12 | 40 |
| 81 | 8 | 4 | 4 | 4 | 8 | 28 | 8 | 4 | 4 | 16 | 12 | 44 |
| 82 | 0 | 8 | 8 | 8 | 8 | 32 | 8 | 4 | 0 | 8 | 4 | 24 |
| 83 | 4 | 4 | 0 | 8 | 4 | 20 | 4 | 16 | 20 | 12 | 12 | 64 |
| 84 | 0 | 8 | 4 | 8 | 0 | 20 | 8 | 12 | 12 | 12 | 0 | 44 |
| 85 | 0 | 4 | 0 | 0 | 0 | 4 | 4 | 12 | 8 | 4 | 0 | 28 |
| 86 | 4 | 0 | 4 | 4 | 0 | 12 | 4 | 16 | 4 | 16 | 4 | 44 |
| 87 | 32 | 0 | 0 | 0 | 0 | 3 | 8 | 16 | 8 | 8 | 8 | 48 |
| 88 | 0 | 4 | 0 | 0 | 1 | 5 | 0 | 8 | 83 | 4 | 0 | 20 |
| 89 | 0 | 0 | 0 | 0 | 0 | 0 | 4 | 0 | 4 | 0 | 0 | 8 |
| 90 | 0 | 4 | 0 | 0 | 0 | 4 | 0 | 8 | 0 |  | 4 | 16 |
| Total | 31 | 64 | 28 | 60 | 53 | 236 | 64 | 120 | 104 | 128 | 76 | 492 |

1 -4 persons, 2 -1 person, 3 -12 persons

Table A-2: Composition of control group cases by sex and comorbidity index over age.

|  | Control | TAVI | p-value |
| --- | --- | --- | --- |
| Alcoholic liver disease | 1.2% | 0.5% | 0.411 |
| Atherosclerosis* | 27.3% | 34.8% | 0.046 |
| Breast cancer | 4.8% | 3.2% | 0.346 |
| Cerebrovascular diseases* | 48.2% | 38.0% | 0.012 |
| Colorectal cancer | 4.1% | 2.7% | 0.357 |
| Dementia | 18.1% | 12.3% | 0.058 |
| Depression | 29.5% | 23.5% | 0.104 |
| Diabetes* | 43.5% | 55.6% | 0.003 |
| External injuries | 52.6% | 57.2% | 0.260 |
| Hypertension | 93.4% | 95.7% | 0.533 |
| Ischaemic heart diseases* | 69.5% | 79.7% | 0.006 |
| Kidney diseases | 40.8% | 41.2% | 0.925 |
| Lower extremity injuries* | 17.5% | 10.7% | 0.025 |
| Lung cancer | 1.1% | 1.6% | 0.572 |
| Lung diseases | 41.8% | 49.2% | 0.067 |
| Myocardial infarction | 17.2% | 17.7% | 0.878 |
| Nervous diseases* | 56.7% | 47.6% | 0.025 |
| Pancreatic cancer | 0.3% | 0.0% | 0.473 |
| Parkinson's disease | 5.0% | 3.2% | 0.311 |
| Prostate cancer | 3.3% | 3.7% | 0.763 |
| Stomach cancer | 0.7% | 0.0% | 0.256 |
| Vascular diseases | 40.3% | 46.0% | 0.155 |
| * p<0.05 Chi² test |  |  |  |

Table A-3: Share of cases with prevalent disease in Control/TAVI groups at incident aortic valve disease diagnosis.
